# Supplementary material for: Universal passive radiative cooling behavior of aerogels
Source: Royal Society of Chemistry journal article supplement (doi:10.1039/d3ta02397d), 2023-01-01
Supplement: d3ta02397d1.pdf [file d3ta02397d1.pdf]

Electronic Supplementary Information (ESI) for

# Universal Passive Radiative Cooling Behavior of Aerogels

*Bingjie Ma<sup>a,b</sup>, Bing Wu<sup>c</sup>, Peiying Hu<sup>a</sup>, Ling Liu<sup>a,b</sup>, Jin Wang<sup>a,b,\*</sup>*

<sup>a</sup> Key Laboratory of Multifunctional Nanomaterials and Smart Systems, Suzhou Institute of Nano-Tech and Nano-Bionics, Chinese Academy of Sciences, Suzhou 215123, P. R. China

<sup>b</sup> School of Nano-Tech and Nano-Bionics, University of Science and Technology of China, Hefei 230026, P. R. China

<sup>c</sup> Emergency Research Institute, Chinese Institute of Coal Science, Beijing 100013, P. R. China.

\*E-mail: [jwang2014@sinano.ac.cn](mailto:jwang2014@sinano.ac.cn)

## Supplementary Figures:

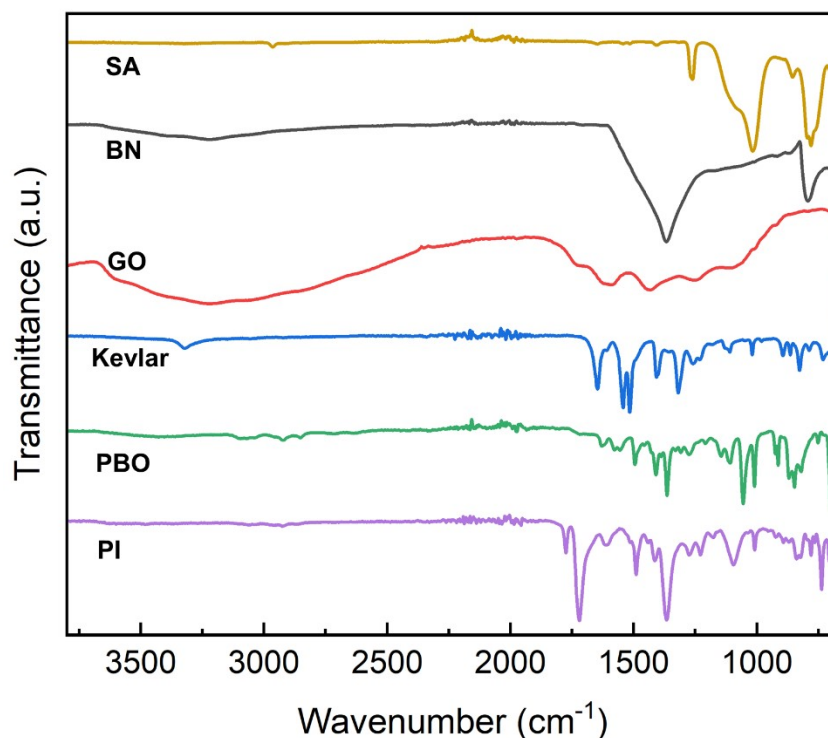

**Fig. S1.** TF-IR spectra of the aerogels.

Fig. S1 shows the FT-IR spectra of the silica, BN, GO, Kevlar, PBO, and PI aerogels. For the silica aerogel, the vibration peaks at  $2980\text{ cm}^{-1}$  can be clearly observed, corresponding to that of  $-\text{CH}_3$ . Besides, the vibration peaks of Si-O-Si and Si-C can be observed at  $1100\text{ cm}^{-1}$  and  $840\text{ cm}^{-1}$ , respectively. For the NB aerogels, there are two strong characteristic absorptions at  $1350\text{ cm}^{-1}$  and  $796\text{ cm}^{-1}$ , which are owing to the B-N stretching vibration and B-N out-of-plane vibration bending, respectively. For GO aerogels, the two peaks at  $1739\text{ cm}^{-1}$  and  $1590\text{ cm}^{-1}$  could be attributed to the stretching vibrations of C=O and C=C on GO. For Kevlar aerogel, the main organic functional groups,  $3321(\text{N-H})$ ,  $1644(\text{C=O})$ , and  $1017\text{ cm}^{-1}(\text{C-H})$  can be observed. In PBO aerogel, oxazole ring deformation at  $848\text{ cm}^{-1}$ , C-O bond stretch at  $925\text{ cm}^{-1}$ , benzene ring deformation at  $1010\text{ cm}^{-1}$ , C-N bond stretch at  $1366\text{ cm}^{-1}$ , C-O, C-C, and oxazole ring deformation abbreviation at  $1496\text{ cm}^{-1}$ , can be identified. For PI aerogels, the peak at  $1366\text{ cm}^{-1}$  is assigned to the vibration of the imide ring (C-N), and the peak at  $1719\text{ cm}^{-1}$  is attributed to the imide linkage.

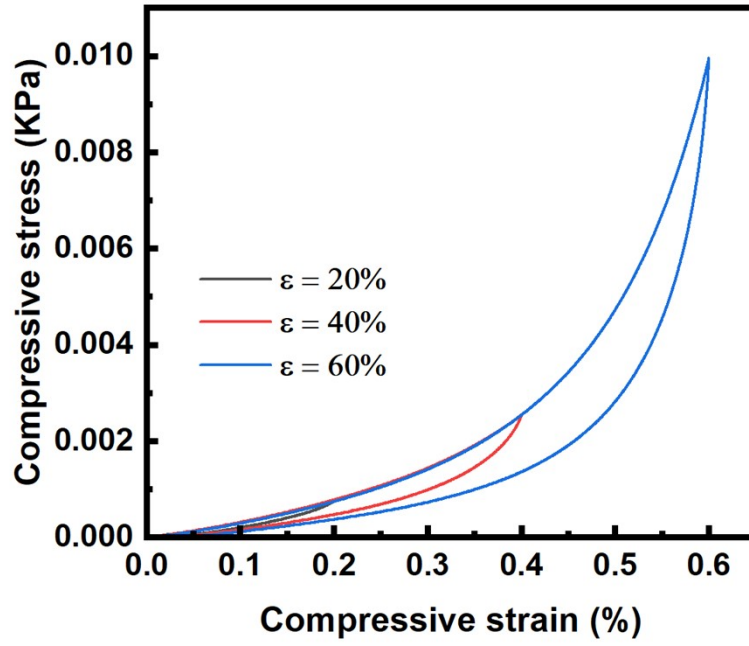

**Fig. S2.** The compression  $\sigma$ - $\epsilon$  curve of the silica aerogel loading - unloading period with increasing  $\epsilon$  and the experimental snapshot of the period,  $\epsilon$  is 20, 40, and 60 %, respectively.

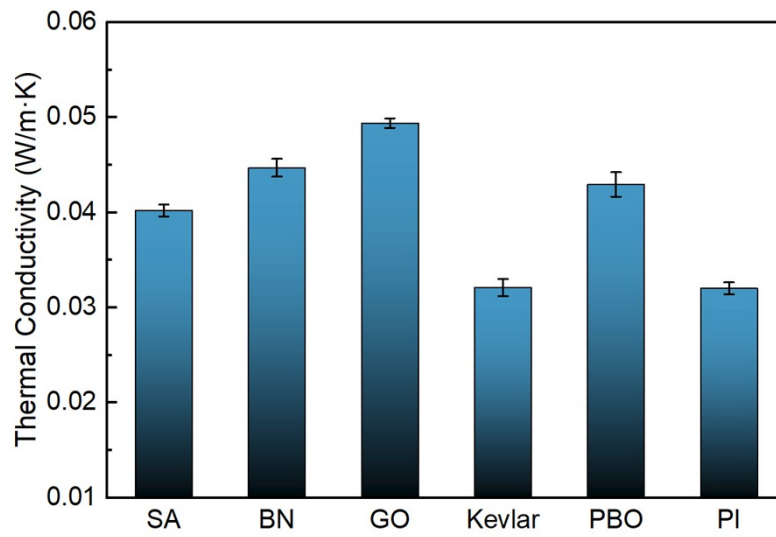

**Fig. S3.** Thermal conductivities of the aerogels.

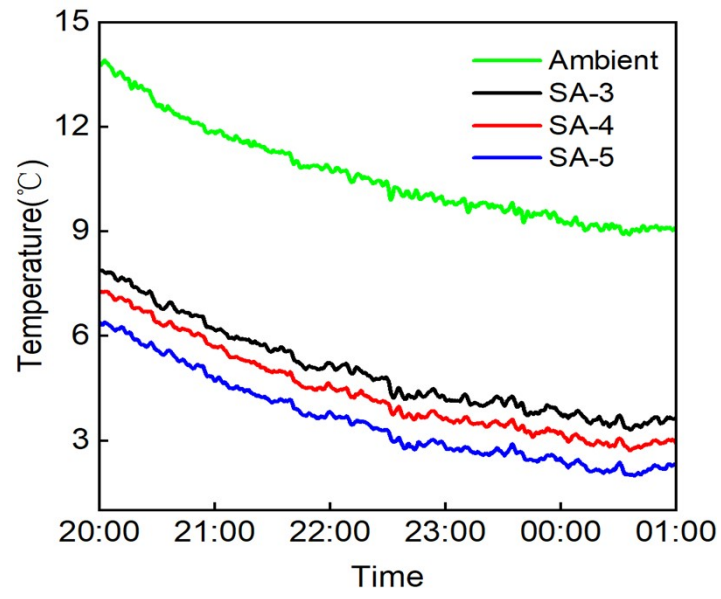

**Fig. S4.** The PRC performance of the SA with different thicknesses as indicated

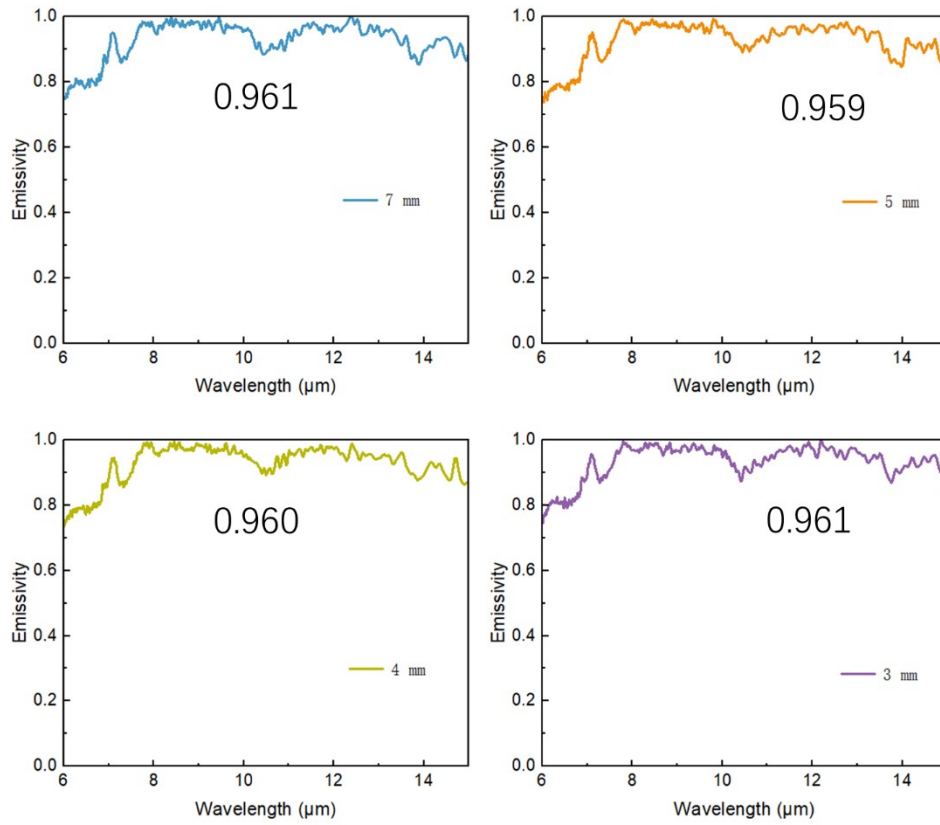

**Fig. S5.** The IR emissivity of the SA with different thicknesses as indicated.

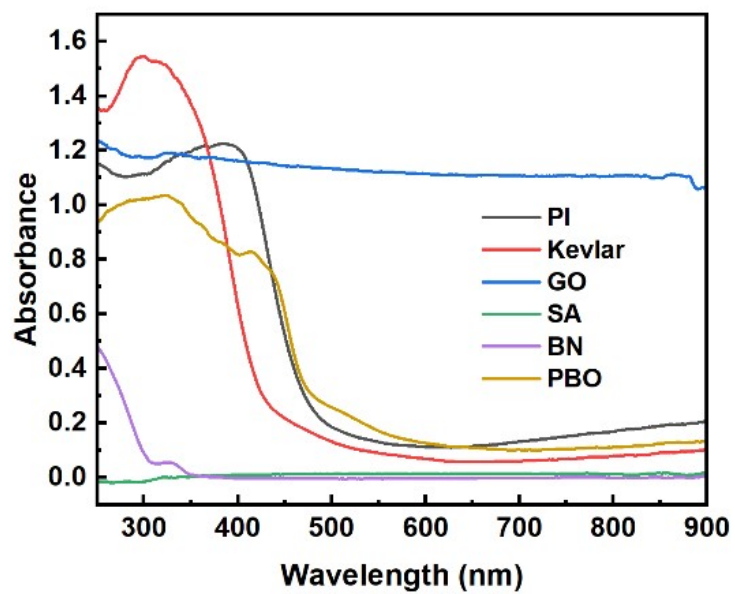

Fig. S6. Infrared absorption of each aerogel in the UV-Vis-NIR band.
